# Supplementary material for: Association of cellular HIV-1 DNA and virological success of antiretroviral treatment in HIV-infected sub-Saharan African adults
Source: PubMed Central journal article supplement (PMC8800335; doi:10.1186/s12879-022-07082-2), 2022-01-29
Supplement: 12879_2022_7082_MOESM1_ESM.pdf [file 12879_2022_7082_MOESM1_ESM.pdf]

**Additional file**

## Methods for HIV-DNA quantification

HIV-1 DNA quantification was performed using Generic HIV DNA Cell (Biocentric, Bandol, France). Primers sequence presented below were previously described (Avettand-Fenoel et al, J Med Virol 2009)

**Forward primer (NEC005) :** 5'-GCCTCAATAAAGCTTGCC-3'

**Reverse primer (NEC131) :** 5'-GGCGCCACTG-CTAGAGATTTT-3'

**TaqMan probe (MLC1) MGB LTR :** 5'-AAGTRGTGTGT-GCCC-3'

5' reporter, 6-carboxyfluorescein (FAM) and the 3' quencher, 6-carboxytetramethylrhodamin (TAMTRA) (Applied Biosystems, Foster City, CA).

Schvachsa et al. 2007 showed excellent correlation between the quantification of HIV-1 RNA and HIV-1 DNA of non-B subtypes using this primer and probe set.

The distribution of HIV-1 subtypes found in Côte d'Ivoire is presented in the table below (from Rouet F et al J Acquir Immune Def Syndr 2007)

**TABLE 1. Group/Subtype Distribution of Collected Samples: Necker Hospital, Paris, France**

| Genetic Group/Subtype | Panels |      |      | Clinical Samples | Total (%)  |
|-----------------------|--------|------|------|------------------|------------|
|                       | WHO    | ANRS | AC11 |                  |            |
| Group M               |        |      |      |                  |            |
| B subtype             | 1      | 0    |      | 266              | 267 (51.5) |
| Non-B subtypes        |        |      |      |                  |            |
| Subtype A             | 1      | 11   |      | 30               | 42 (8.1)   |
| Subtype C             | 1      | 15   |      | 7                | 23 (4.4)   |
| Subtype D             | 1      | 8    |      | 10               | 19 (3.7)   |
| Subtype F             | 1      | 8    |      | 8                | 17 (3.3)   |
| Subtype G             | 1*     | 9    |      | 9                | 19 (3.7)   |
| Subtype H             | 1      | 7    |      | 4                | 12 (2.3)   |
| Subtype J             | 0      | 2    |      | 2                | 4 (0.8)    |
| CRF01_AE              | 1      | 1    |      | 4                | 6 (1.2)    |
| CRF02_AG              | 0      | 3    |      | 60               | 63 (12.2)  |
| CRF05_D/F             | 0      | 0    |      | 1                | 1 (0.2)    |
| CRF06_cpx             | 0      | 7    |      | 8                | 15 (2.9)   |
| CRF09_cpx             | 0      | 0    |      | 1                | 1 (0.2)    |
| CRF11_cpx             | 0      | 4    |      | 2                | 6 (1.2)    |
| CRF12_BF              | 0      | 2    |      | 0                | 2 (0.4)    |
| CRF14_BG              | 0      | 1    |      | 0                | 1 (0.2)    |
| Unclassified          | 0      | 0    |      | 18               | 18 (3.5)   |
| Total                 | 7      | 78   |      | 164              | 249 (48.1) |
| Group O               | 1      | 0    |      | 0                | 1 (0.2)    |
| Group N               | 1      | 0    |      | 0                | 1 (0.2)    |
| Total                 | 10     | 78   |      | 430              | 518        |

\*AG-GH (RU570) strain.

## **References**

Schvachsa N, Turk G, Burgard M, Dilernia D, Carobene M, Pippo M, et al. Examination of real-time PCR for HIV-1 RNA and DNA quantitation in patients infected with HIV-1 BF intersubtype recombinant variants. *J Virol Methods* 2007;140:222-227

Rouet F, Chaix ML, Nerrienet E, Ngo-Giang-Huong N, Plantier JC, Burgard M, et al.. Impact of HIV-1 genetic diversity on plasma HIV-1 RNA Quantification: Usefulness of the Agence Nationale de Recherches sur le SIDA second-generation long terminal repeatbased real-time reverse transcriptase polymerase chain reaction test. *J Acquir Immune Defic Syndr* 2007; 45:380–388
